# Supplementary material for: Sudachinoid- and Ichangensin-Type Limonoids from Citrus junos Downregulate Pro-Inflammatory Cytokines
Source: PubMed Central journal article supplement (PMC7555237; doi:10.3390/ijms21186963), 2020-09-22
Supplement: ijms-21-06963-s001.pdf [file ijms-21-06963-s001.pdf]

## Supplementary data

# Sudachinoid and Ichangensin Type Limonoids from *Citrus junos* down-Regulate Pro-inflammatory Cytokines

Jihun Shin, Hwa Young Song, Mina Lee

College of Pharmacy, Suncheon National University, 255 Jungangno, Suncheon-si 57922, Jeonnam, Republic of Korea

\* Correspondence: minalee@suncheon.ac.kr; Tel. 82-61-750-3764 Fax. 82-61-750-3708

### Supporting Information Available

- Figure S1. <sup>1</sup>H-NMR spectrum of compound 1
- Figure S2. <sup>13</sup>C-NMR spectrum of compound 1
- Figure S3. <sup>1</sup>H<sup>1</sup>H COSY spectrum of compound 1
- Figure S4. HMQC spectrum of compound 1
- Figure S5. HMBC spectrum of compound 1
- Figure S6. DEPT spectrum of compound 1
- Figure S7. HRESIMS of compound 1

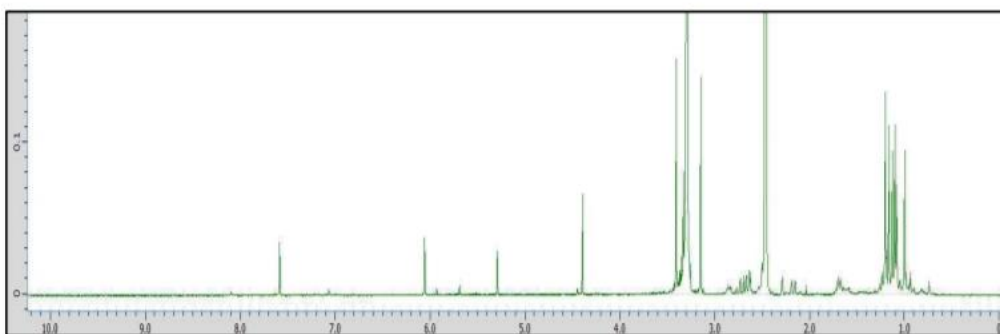

Figure S1.  $^1\text{H}$ -NMR spectra of compound 1.

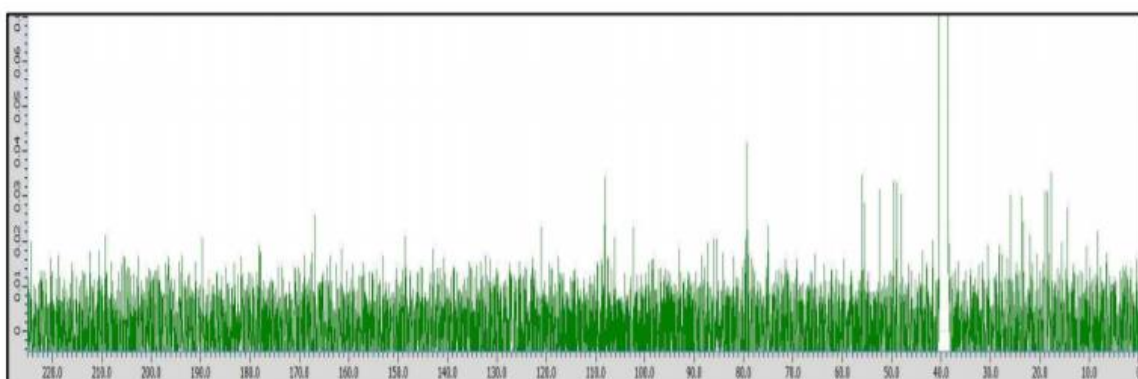

Figure S2.  $^{13}\text{C}$ -NMR spectra of compound 1.

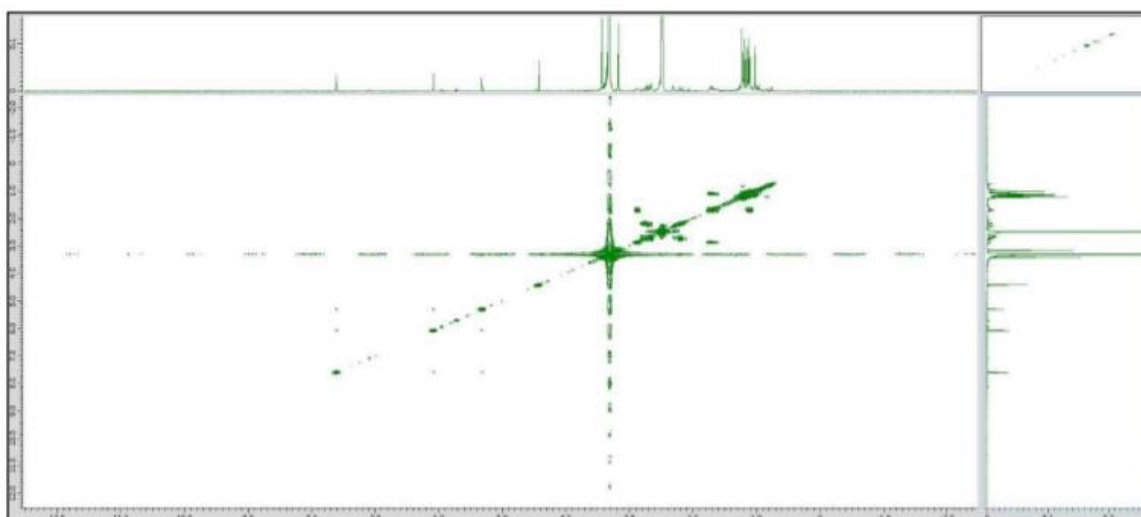

Figure S3.  $^1\text{H}$ - $^1\text{H}$  COSY spectrum of compound 1.

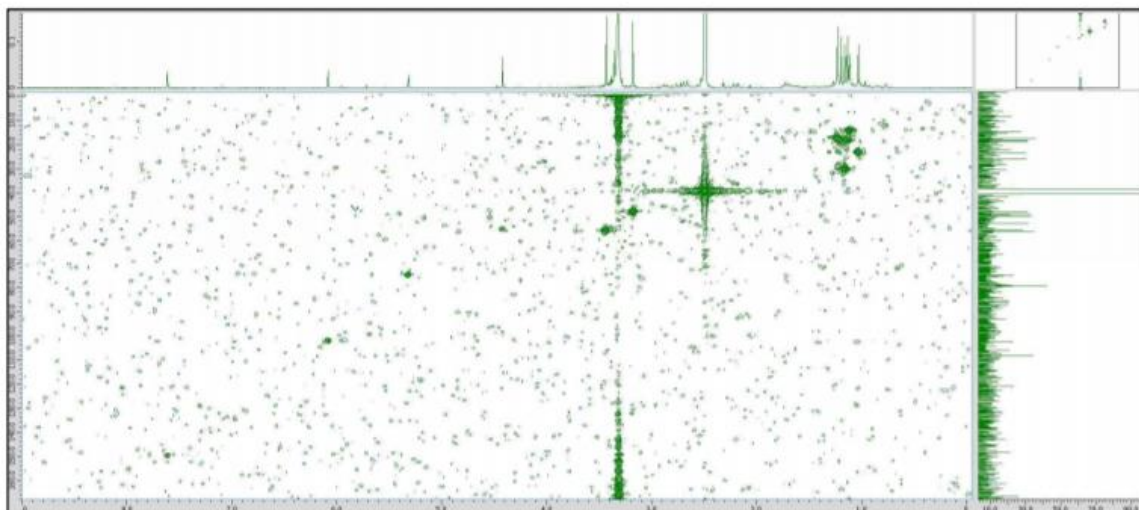

Figure S4. HMQC spectrum of compound 1.

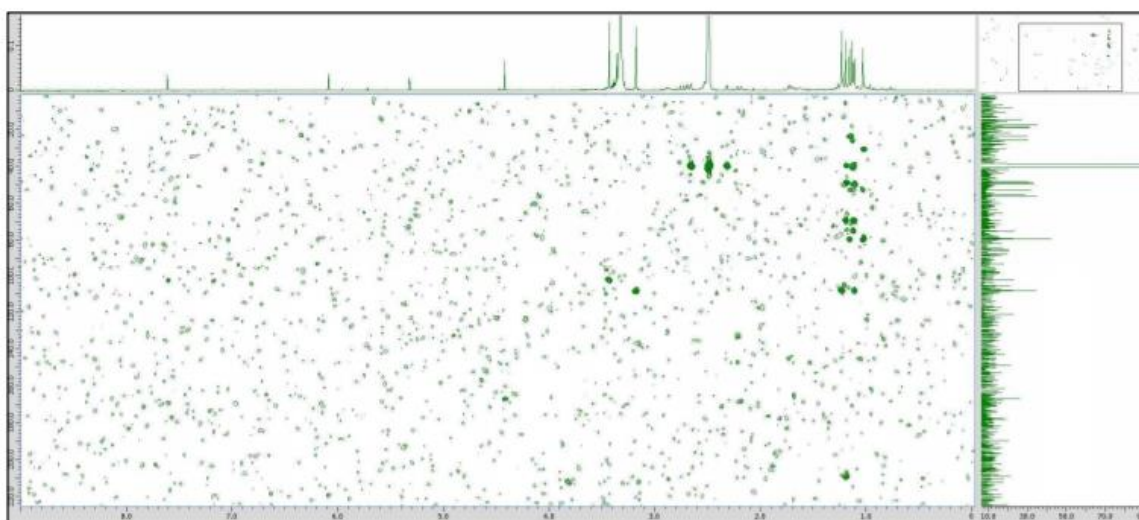

Figure S5. HMBC spectrum of compound 1.

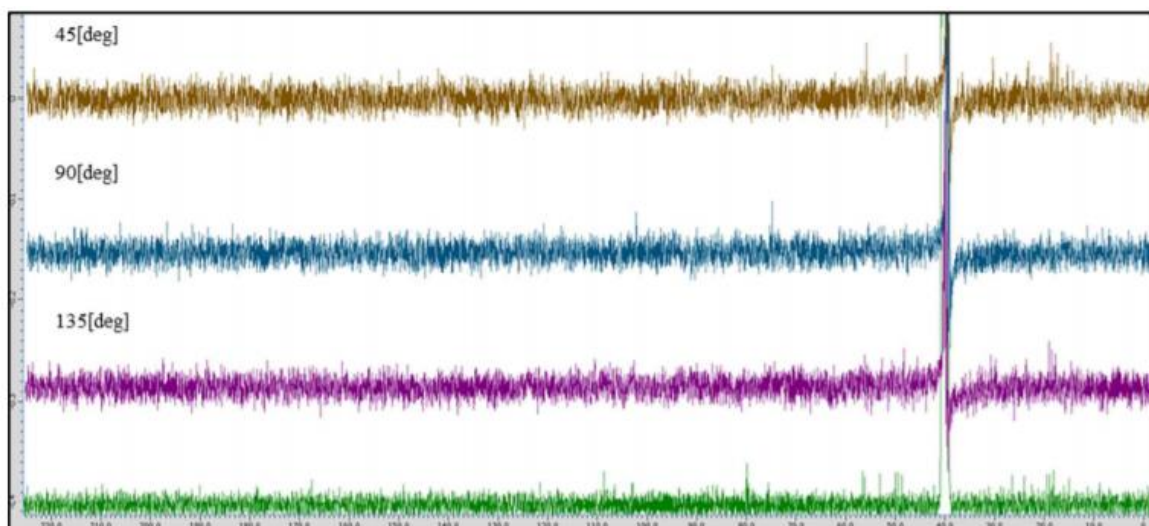

Figure S6. DEPT spectrum of compound 1.

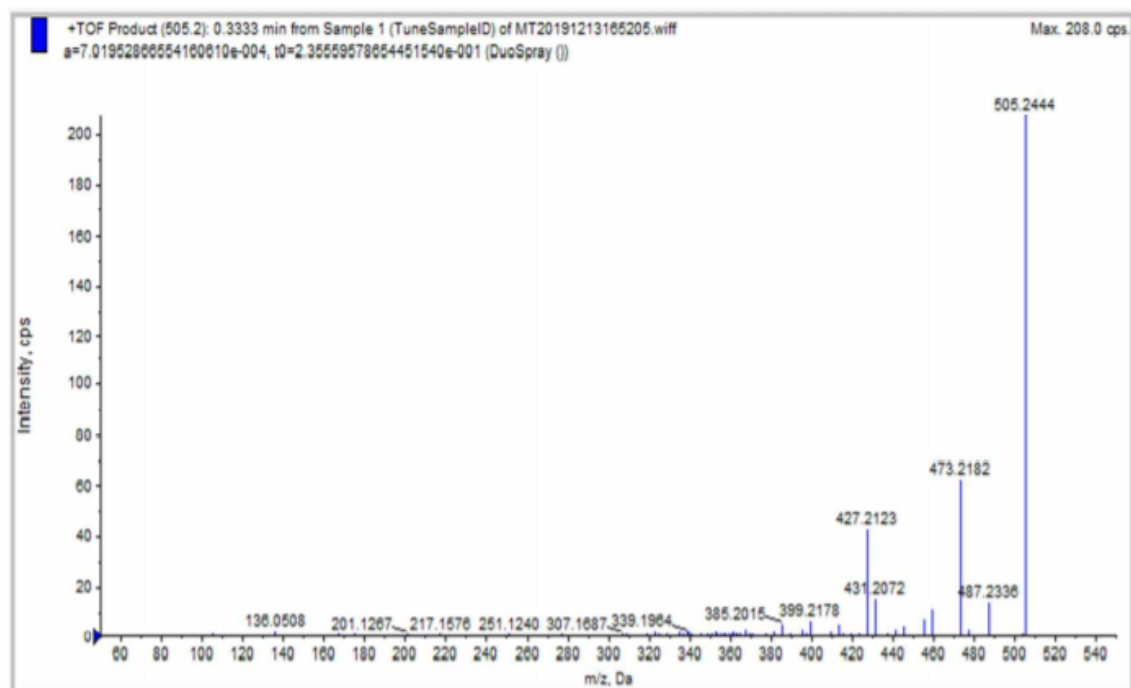

Figure S7. HRESIMS of compound 1.
